# Supplementary material for: Impact of water uptake and mixing state on submicron particles deposition in the human respiratory tract (HRT): Based on explicit hygroscopicity measurements at HRT-like conditions
Source: Copernicus journal article supplement (doi:10.5194/egusphere-2022-256), 2022-05-03
Supplement: Supplementary file 1 [file egusphere-2022-256-supplement.pdf]

# Impact of water uptake and mixing state on submicron particles deposition in the human respiratory tract (HRT): Based on explicit hygroscopicity measurements at HRT-like conditions

Ruiqi Man<sup>1</sup>, Zhijun Wu<sup>1,2</sup>, Taomou Zong<sup>1</sup>, Aristeidis Voliotis<sup>3,4</sup>, Johannes Größ<sup>5</sup>, Dominik van Pinxteren<sup>5</sup>, Limin Zeng<sup>1</sup>, Hartmut Herrmann<sup>5</sup>, Alfred Wiedensohler<sup>5</sup>, Min Hu<sup>1</sup>

<sup>1</sup>State Key Joint Laboratory of Environmental Simulation and Pollution Control, College of Environmental Sciences and Engineering, Peking University, 100871, Beijing, China

<sup>2</sup>Collaborative Innovation Center of Atmospheric Environment and Equipment Technology, Nanjing University of Information Science and Technology, 210044, Nanjing, China

<sup>3</sup>National Centre for Atmospheric Science, Department of Earth and Environmental Science, School of Natural Sciences, The University of Manchester, Oxford Road, M13 9PL, Manchester, UK

<sup>4</sup>Centre for Atmospheric Science, Department of Earth and Environmental Science, School of Natural Sciences, The University of Manchester, Oxford Road, M13 9PL, Manchester, UK

<sup>5</sup>Leibniz Institute for Tropospheric Research, 04318, Leipzig, Germany

Correspondence to: Zhijun Wu (zhijunwu@pku.edu.cn)

## [Supporting Information]

Table S1 Regional and total deposition doses in children group

| Child | Dose without hygroscopicity [10 <sup>8</sup> /day] |             |        | Dose considering hygroscopicity [10 <sup>8</sup> /day] |             |       | Impact of hygroscopicity on dose |             |        |
|-------|----------------------------------------------------|-------------|--------|--------------------------------------------------------|-------------|-------|----------------------------------|-------------|--------|
|       | hydrophobic                                        | hygroscopic | sum    | hydrophobic                                            | hygroscopic | sum   | hydrophobic                      | hygroscopic | sum    |
| Head  | 0.54                                               | 5.39        | 5.95   | 0.54                                                   | 5.46        | 6.01  | 0.34%                            | -1.29%      | -0.94% |
| TB    | 3.22                                               | 28.99       | 32.26  | 3.05                                                   | 21.41       | 24.46 | 5.18%                            | 26.16%      | 24.16% |
| P     | 6.97                                               | 63.02       | 70.07  | 6.63                                                   | 45.03       | 51.66 | 4.89%                            | 28.54%      | 26.27% |
| Total | 10.73                                              | 97.40       | 108.28 | 10.22                                                  | 71.90       | 82.13 | 4.75%                            | 26.18%      | 24.14% |

Table S2 Regional and total deposition doses in adults group

| Adult | Dose without hygroscopicity [10 <sup>8</sup> /day] |             |        | Dose considering hygroscopicity [10 <sup>8</sup> /day] |             |        | Impact of hygroscopicity on dose |             |        |
|-------|----------------------------------------------------|-------------|--------|--------------------------------------------------------|-------------|--------|----------------------------------|-------------|--------|
|       | hydrophobic                                        | hygroscopic | sum    | hydrophobic                                            | hygroscopic | sum    | hydrophobic                      | hygroscopic | sum    |
| Head  | 1.66                                               | 15.92       | 17.61  | 1.66                                                   | 15.87       | 17.53  | 0.10%                            | 0.33%       | 0.48%  |
| TB    | 8.35                                               | 74.28       | 82.73  | 7.88                                                   | 53.24       | 61.13  | 5.57%                            | 28.32%      | 26.11% |
| P     | 12.81                                              | 114.90      | 127.84 | 12.16                                                  | 82.57       | 94.72  | 5.09%                            | 28.14%      | 25.90% |
| Total | 22.82                                              | 205.10      | 228.18 | 21.70                                                  | 151.68      | 173.38 | 4.90%                            | 26.05%      | 24.02% |

Table S3 Regional and total deposition doses in the elderly group

| Elderly | Dose without hygroscopicity [10 <sup>8</sup> /day] |             |        | Dose considering hygroscopicity [10 <sup>8</sup> /day] |             |        | Impact of hygroscopicity on dose |             |        |
|---------|----------------------------------------------------|-------------|--------|--------------------------------------------------------|-------------|--------|----------------------------------|-------------|--------|
|         | hydrophobic                                        | hygroscopic | sum    | hydrophobic                                            | hygroscopic | sum    | hydrophobic                      | hygroscopic | sum    |
| Head    | 1.61                                               | 15.49       | 17.13  | 1.60                                                   | 15.52       | 17.12  | 0.31%                            | -0.15%      | 0.07%  |
| TB      | 8.26                                               | 73.58       | 81.94  | 7.79                                                   | 52.89       | 60.68  | 5.59%                            | 28.12%      | 25.94% |
| P       | 13.24                                              | 118.79      | 132.16 | 12.55                                                  | 85.28       | 97.83  | 5.18%                            | 28.21%      | 25.97% |
| Total   | 23.11                                              | 207.86      | 231.24 | 21.94                                                  | 153.69      | 175.63 | 4.99%                            | 26.06%      | 24.04% |

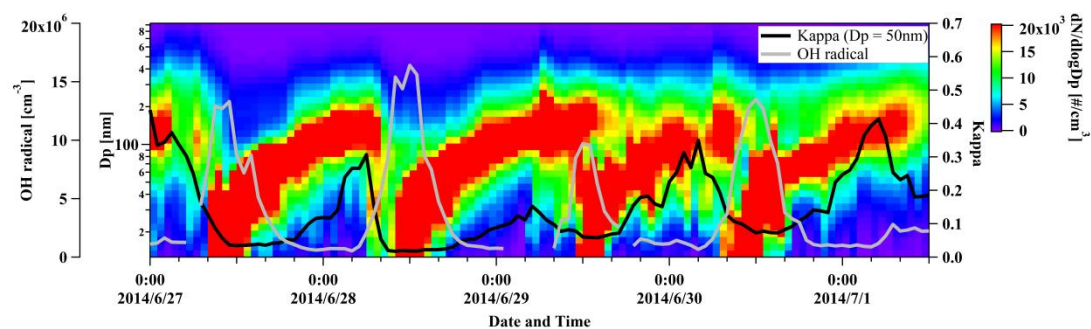

Figure S1. The particle number size distribution of typical new particle formation events from June 27 to July 2, 2014. The black line represents the corresponding hygroscopicity parameter ( $\kappa$ ). The gray line represents the concentrations of OH radical.

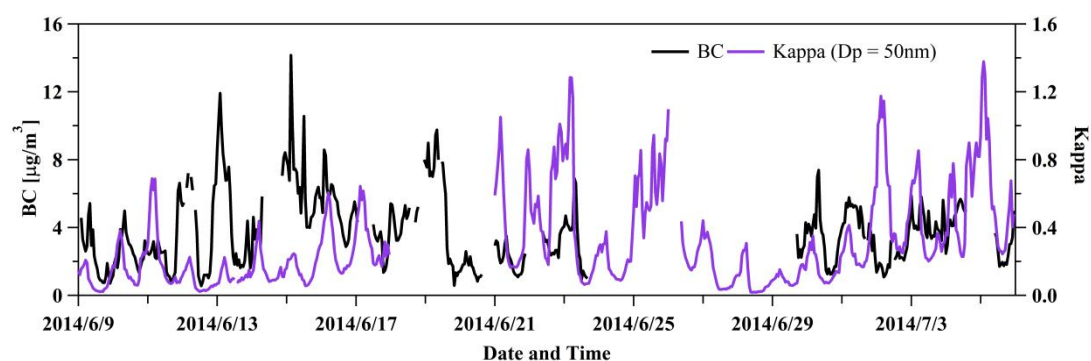

Figure S2. The time series of the BC mass concentration and the  $\kappa$  of particles with diameters of 50 nm. The black and purple line represent BC and  $\kappa$ , respectively.
